# Supplementary material for: Branch Numbers and Crop Load Combination Effects on Production and Fruit Quality of Flat Peach Cultivars (Prunus persica (L.) Batsch) Trained as Catalonian Vase
Source: MDPI journal article supplement (doi:10.3390/plants11030308), 2022-01-24
Supplement: s1 [file s1]

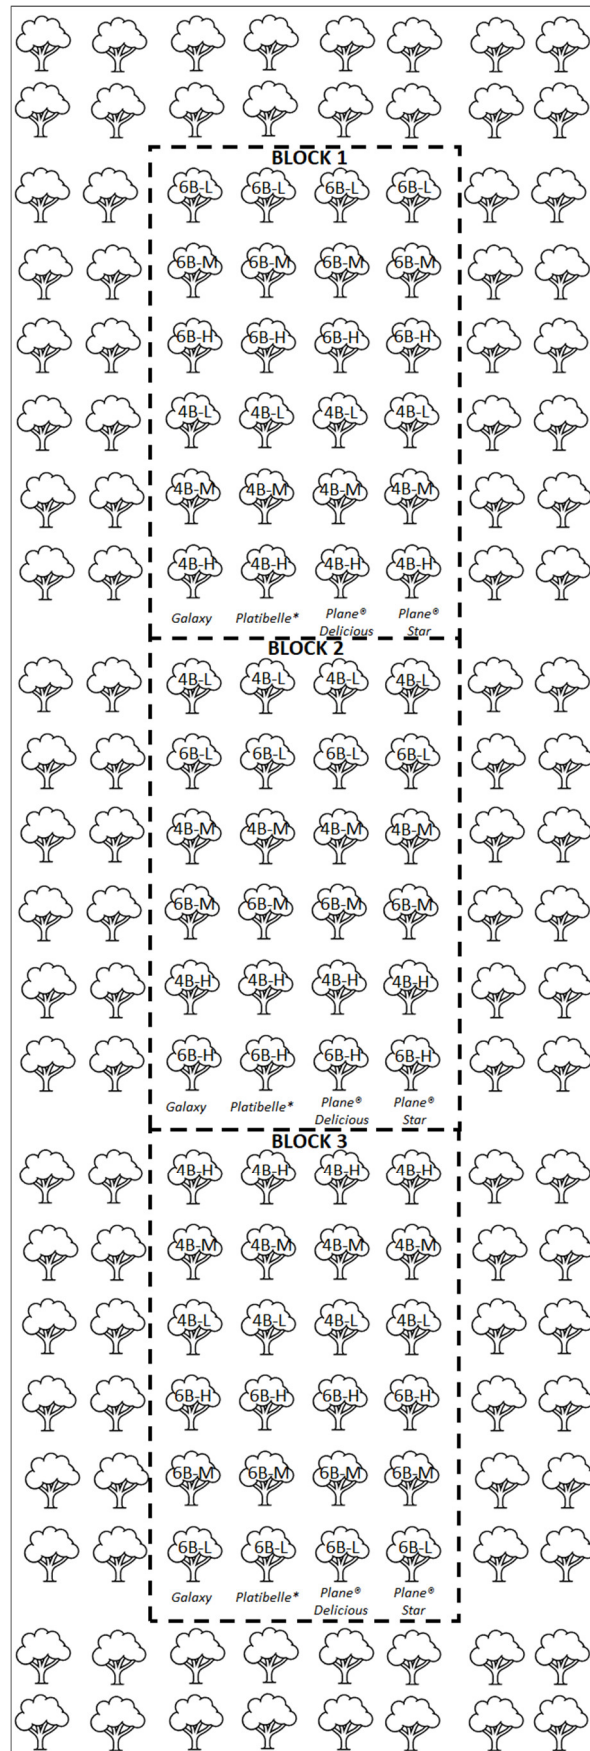

**Figure S1.** Experimental design of the study (4B: 4 branches; 6B: 6 branches; L: low crop load; M: medium crop load; H: high crop load). This scheme was used for both 2017 and 2018 years. the dotted edges delimit the study area. The trees outside this area represent the "board" effect.
